# Supplementary material for: Donor Atom Preference of Organoruthenium and Organorhodium Cations on the Interaction with Novel Ambidentate (N,N) and (O,O) Chelating Ligands in Aqueous Solution
Source: Molecules. 2021 Jun 11;26(12):3586. doi: 10.3390/molecules26123586 (PMC8230953; doi:10.3390/molecules26123586)
Supplement: Supplementary file 1 [file molecules-26-03586-s001.zip › molecules-1213133-Supplementary.pdf]

**Donor atom preference of organoruthenium and –rhodium cations on the interaction  
with novel ambidentate (N,N) and (O,O) chelating ligands in aqueous solution**

Sándor Nagy,<sup>a</sup> András Ozsváth,<sup>a</sup> Attila Cs. Bényei,<sup>b</sup> Etelka Farkas,<sup>a</sup> Péter Buglyó<sup>a,\*</sup>

<sup>a</sup>Department of Inorganic and Analytical Chemistry, University of Debrecen, H-4032 Debrecen, Egyetem tér 1, Hungary

<sup>b</sup>Department of Physical Chemistry, University of Debrecen, H-4032 Debrecen, Egyetem tér 1, Hungary

*Supporting information*

**Table S1.** Crystallographic parameters and refinement details for H(L1) and H(L2).

|                                                                            |                                                                                              |                                                                       |
|----------------------------------------------------------------------------|----------------------------------------------------------------------------------------------|-----------------------------------------------------------------------|
| Chemical formula                                                           | C <sub>9</sub> H <sub>14</sub> N <sub>2</sub> O <sub>2</sub> ·3(H <sub>2</sub> O)<br>(H(L1)) | C <sub>14</sub> H <sub>17</sub> N <sub>3</sub> O <sub>2</sub> (H(L2)) |
| $M_r$                                                                      | 236.27                                                                                       | 259.30                                                                |
| Crystal system, space group                                                | Triclinic, $P\bar{1}$                                                                        | Monoclinic, $P2_1/c$                                                  |
| Temperature (K)                                                            | 295                                                                                          | 293                                                                   |
| $a, b, c$ (Å)                                                              | 7.7713 (3), 8.3192 (4),<br>10.1279 (4)                                                       | 9.4186 (8), 8.2937 (6),<br>17.7160 (14)                               |
| $\alpha, \beta, \gamma$ (°)                                                | 104.400 (2), 90.021<br>(2), 94.129 (2)                                                       | 99.534 (3)                                                            |
| $V$ (Å <sup>3</sup> )                                                      | 632.45 (5)                                                                                   | 1364.77 (19)                                                          |
| $Z$                                                                        | 2                                                                                            | 4                                                                     |
| Radiation type                                                             | Mo $K\alpha$                                                                                 |                                                                       |
| $\mu$ (mm <sup>-1</sup> )                                                  | 0.10                                                                                         | 0.09                                                                  |
| Crystal size (mm)                                                          | 0.75 × 0.39 × 0.14                                                                           | 0.19 × 0.18 × 0.15                                                    |
| Diffractometer                                                             | Bruker D8 VENTURE                                                                            |                                                                       |
| Absorption correction                                                      | Multi-scan <i>SADABS2016/2</i> - Bruker AXS area detector scaling and absorption correction  |                                                                       |
| $T_{\min}, T_{\max}$                                                       | 0.60, 0.99                                                                                   | 0.87, 0.99                                                            |
| No. of measured, independent and observed [ $I > 2\sigma(I)$ ] reflections | 14222, 2492, 2036                                                                            | 12415, 2572, 1860                                                     |
| $R_{\text{int}}$                                                           | 0.079                                                                                        | 0.058                                                                 |
| $(\sin \theta/\lambda)_{\text{max}}$ (Å <sup>-1</sup> )                    | 0.618                                                                                        | 0.609                                                                 |
| $R[F^2 > 2\sigma(F^2)], wR(F^2), S$                                        | 0.076, 0.230, 1.07                                                                           | 0.049, 0.123, 1.05                                                    |
| No. of reflections                                                         | 2492                                                                                         | 2572                                                                  |
| No. of parameters                                                          | 173                                                                                          | 175                                                                   |
| No. of restraints                                                          | 10                                                                                           | 0                                                                     |
| H-atom treatment                                                           | H atoms treated by a mixture of independent and constrained refinement                       |                                                                       |
| $(\Delta/\sigma)_{\text{max}}$                                             | 0.001                                                                                        | 0.001                                                                 |
| $\Delta_{\text{max}}, \Delta_{\text{min}}$ (e Å <sup>-3</sup> )            | 0.68, -0.31                                                                                  | 0.19, -0.18                                                           |

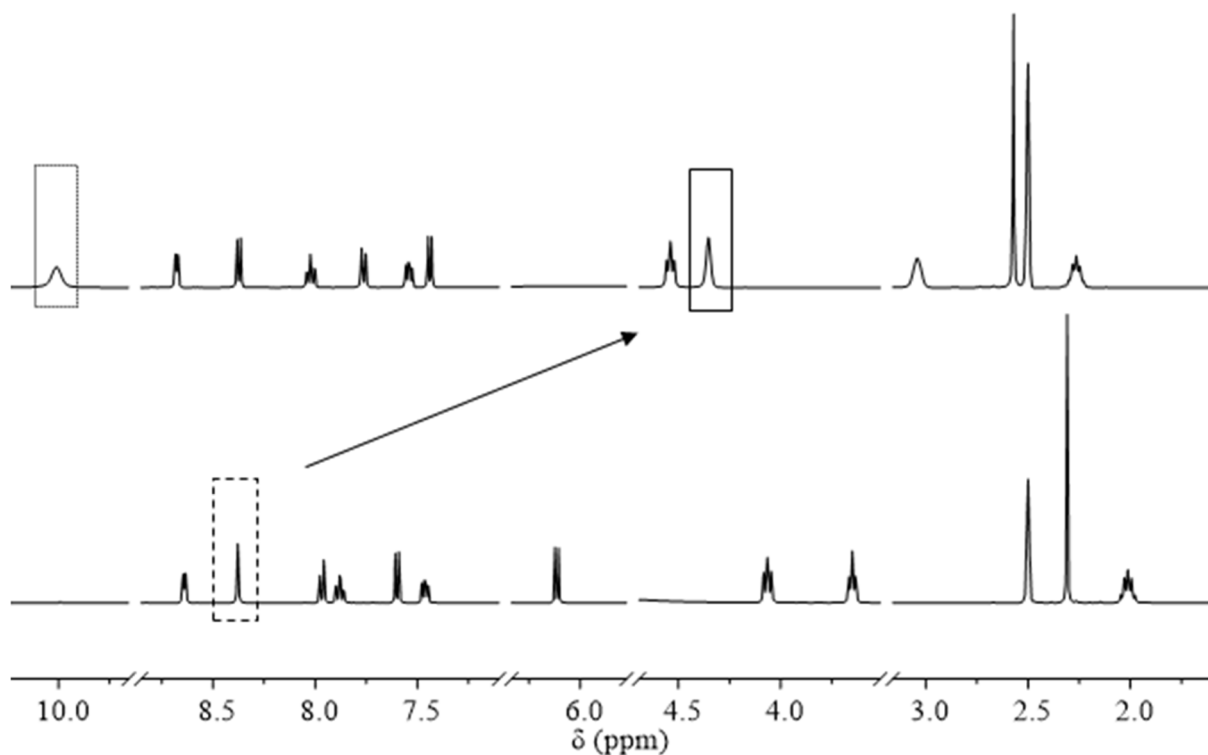

**Figure S1.**  $^1\text{H}$  NMR spectrum of H(L4) (below) and H(L5)·2 HCl (above) in  $d^6$ -DMSO. The appearance of the signal belonging to the  $\text{NH}_2$  protons (10.01 ppm; dotted) in the aromatic and that of  $\text{CH}_2$  (4.35 ppm; solid) in the aliphatic region of the H(L5)·2 HCl spectrum indicates a successful reduction.

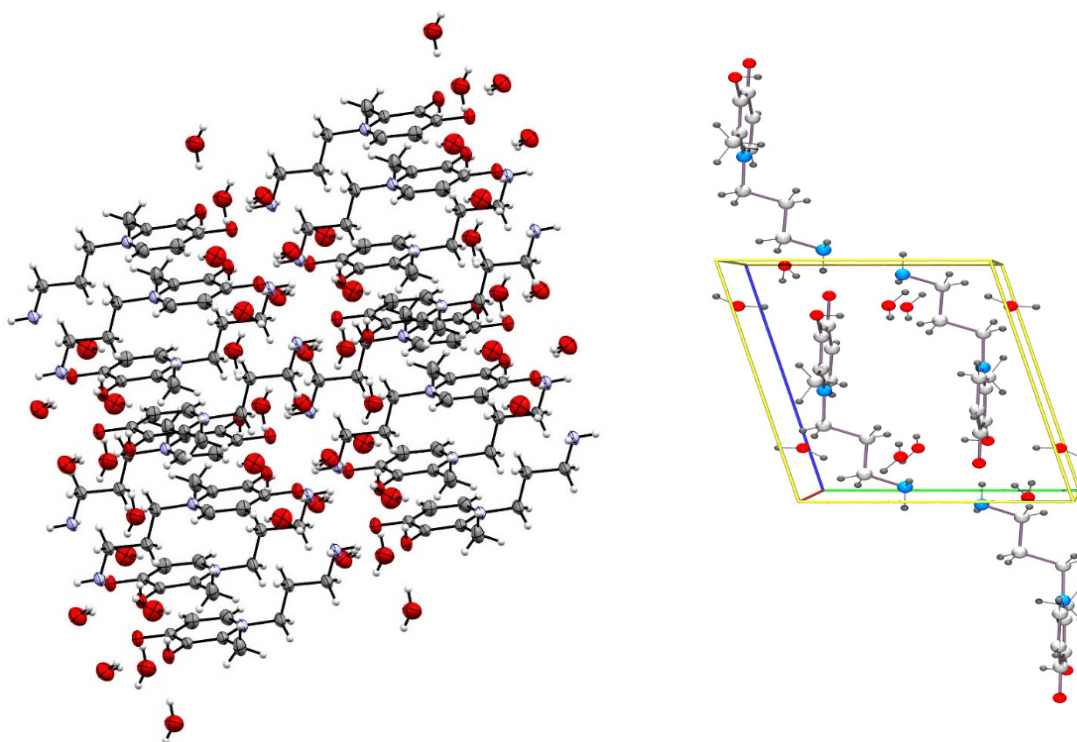

**Figure S2.** Packing diagram of H(L1) showing thermal displacement ellipsoids, drawn at the 50% probability level (left) and view normal to (100) plane (right).

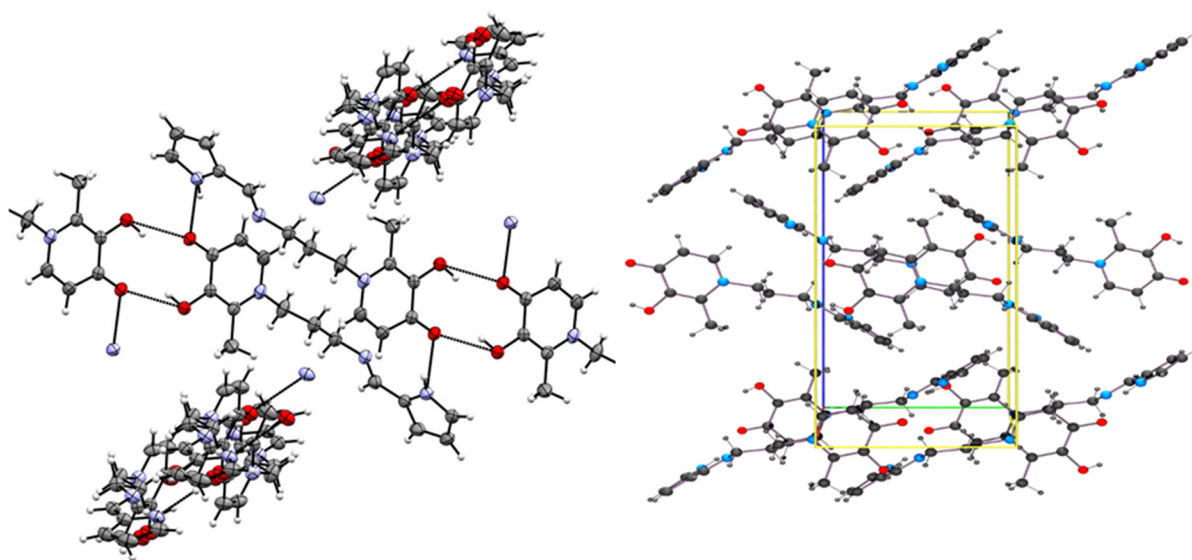

**Figure S3.** Packing diagram of H(L2) showing thermal displacement ellipsoids, drawn at the 50% probability level (left) and view normal to (100) plane (right).

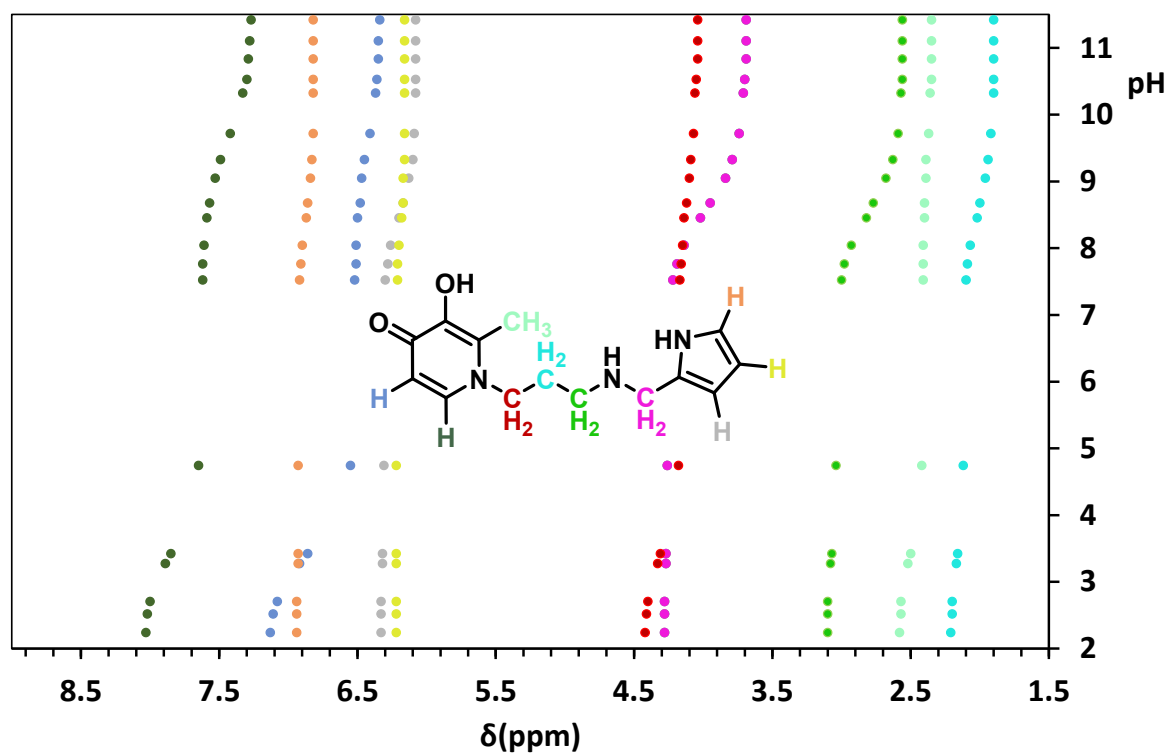

**Figure S4.** pH dependence of the chemical shifts of H(L3) in  $D_2O$ .

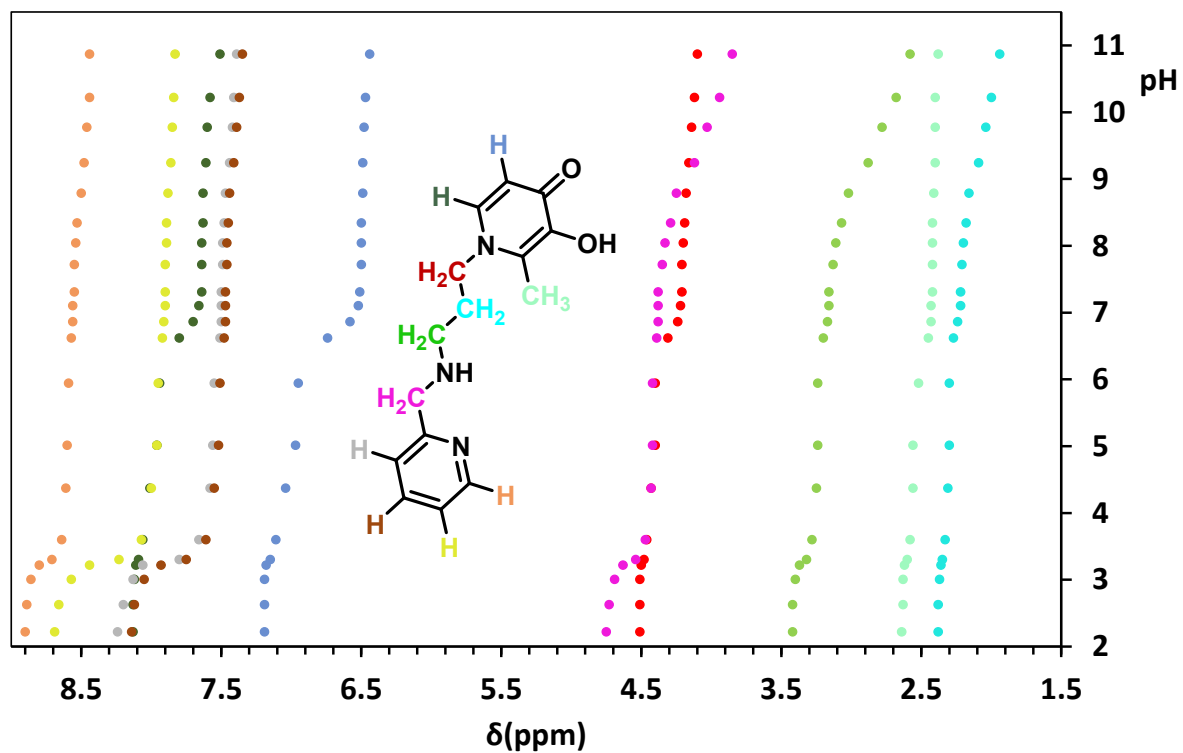

**Figure S5.** pH dependence of the chemical shifts of H(L5) in  $D_2O$ .

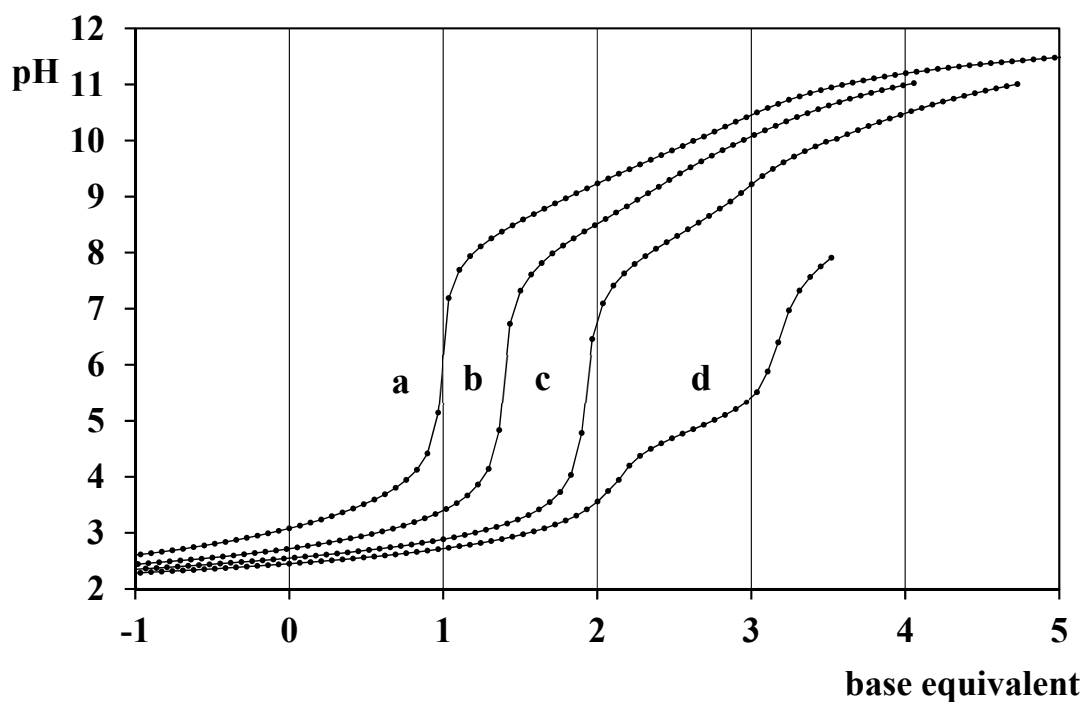

**Figure S6.** Representative titration curves of the  $H^+ - L3$  (a) system and the  $[(\eta^6\text{-p-cym})Ru]^{2+} - L3$  system at 1:2 (b), 1:1 (c) and 2:1 (d) metal ion to ligand ratios ( $c_{L3} = 2.53 \text{ mM}$ ). Negative base equivalent refers to an excess of acid in the sample.

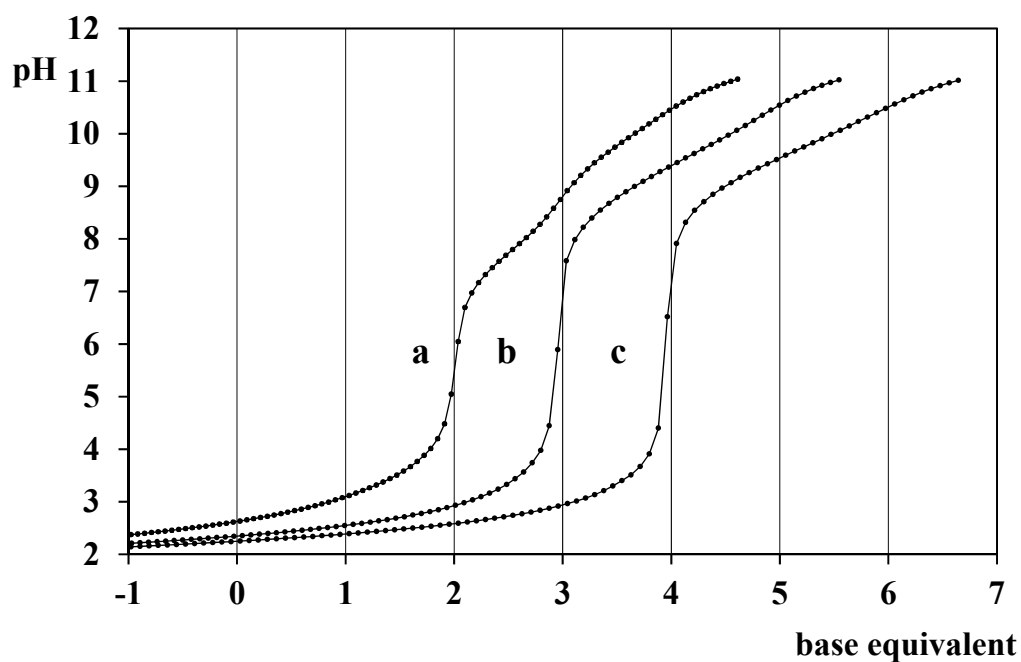

**Figure S7.** Representative titration curves of the  $\text{H}^+$ -L5 (a) system and the  $[(\eta^6\text{-}p\text{-cym})\text{Ru}]^{2+}$ -L5 system at 1:1 (b) and 2:1 (c) metal ion to ligand ratios ( $c_{\text{L5}} = 2.60 \text{ mM}$ ). Negative base equivalent refers to an excess of acid in the sample.

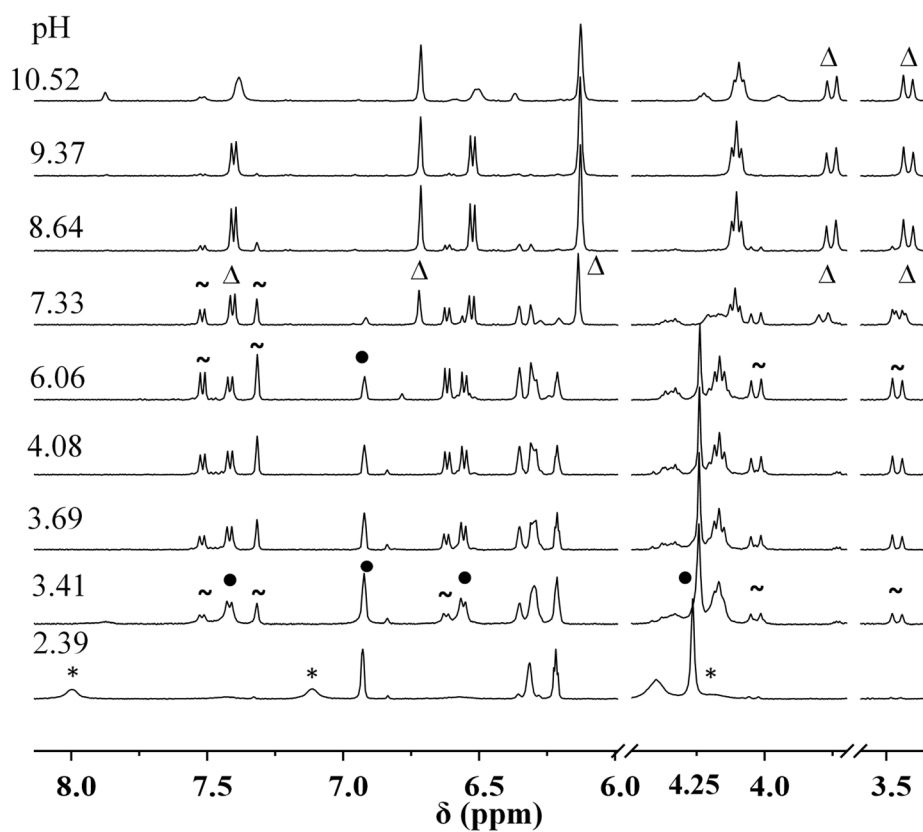

**Figure S8.** pH-dependence of the signals belonging to the L3 protons of a 2.3:1  $[(\eta^5\text{-Cp}^*)\text{Rh}]^{2+}$ -L3 sample,  $c_{\text{L3}} = 5.0$  mM. Symbols represent the signals of the following species:  $\text{H}_x(\text{L3})$  (\*),  $[\text{MHL}]^{2+}$  (•),  $[\text{M}_2\text{L}]^{3+}$  (~),  $[\text{M}_2\text{H}_{-1}\text{L}]^{2+}$  ( $\Delta$ ).

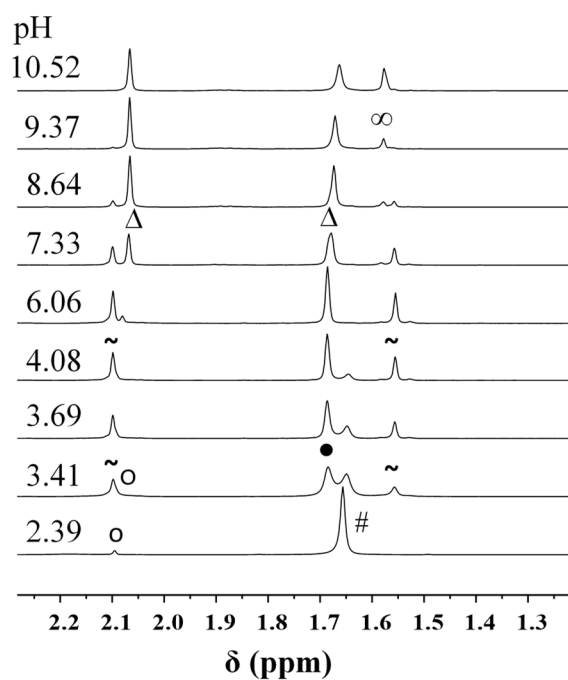

**Figure S9.** pH-dependence of the signals belonging to the Cp\* CH<sub>3</sub> protons of a 2.3:1 [(η<sup>5</sup>-Cp\*)Rh]<sup>2+</sup>-L3 sample, c<sub>L3</sub> = 5.0 mM. Symbols represent the signals of the following species: H<sub>x</sub>(L3) (\*), [(η<sup>5</sup>-Cp\*)Rh]<sup>2+</sup> (#), (O,O) coordinated [MHL]<sup>2+</sup> (•), (N,N) coordinated [MH<sub>2</sub>L]<sup>3+</sup> or [MHL]<sup>2+</sup> (o), [M<sub>2</sub>L]<sup>3+</sup> (~), [M<sub>2</sub>H<sub>-1</sub>L]<sup>2+</sup> (Δ), [M<sub>2</sub>(OH)<sub>3</sub>]<sup>+</sup> (∞).

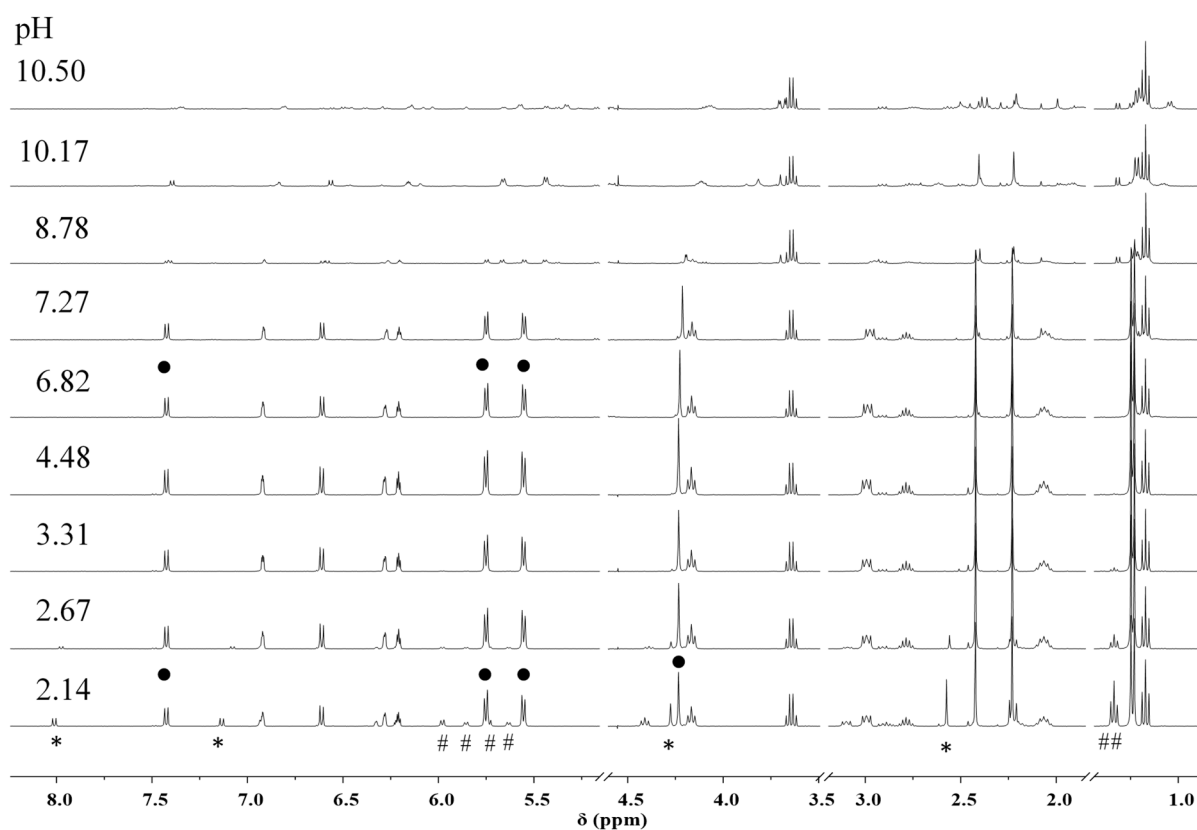

**Figure S10.** pH-dependence of the signals belonging to the protons in the  $[(\eta^6\text{-}p\text{-cym})\text{Ru}]^{2+}$ –L3 system at 1:1 ratio,  $c_{\text{L3}} = 5.0$  mM. Symbols represent the signals of the following species:  $\text{H}_x(\text{L3})$  (\*),  $[\text{M}(\text{H}_2\text{O})_3]^{2+}$  and  $[\text{M}(\text{Cl})_3]^-$  (#),  $[\text{MHL}]^{2+}$  (•).

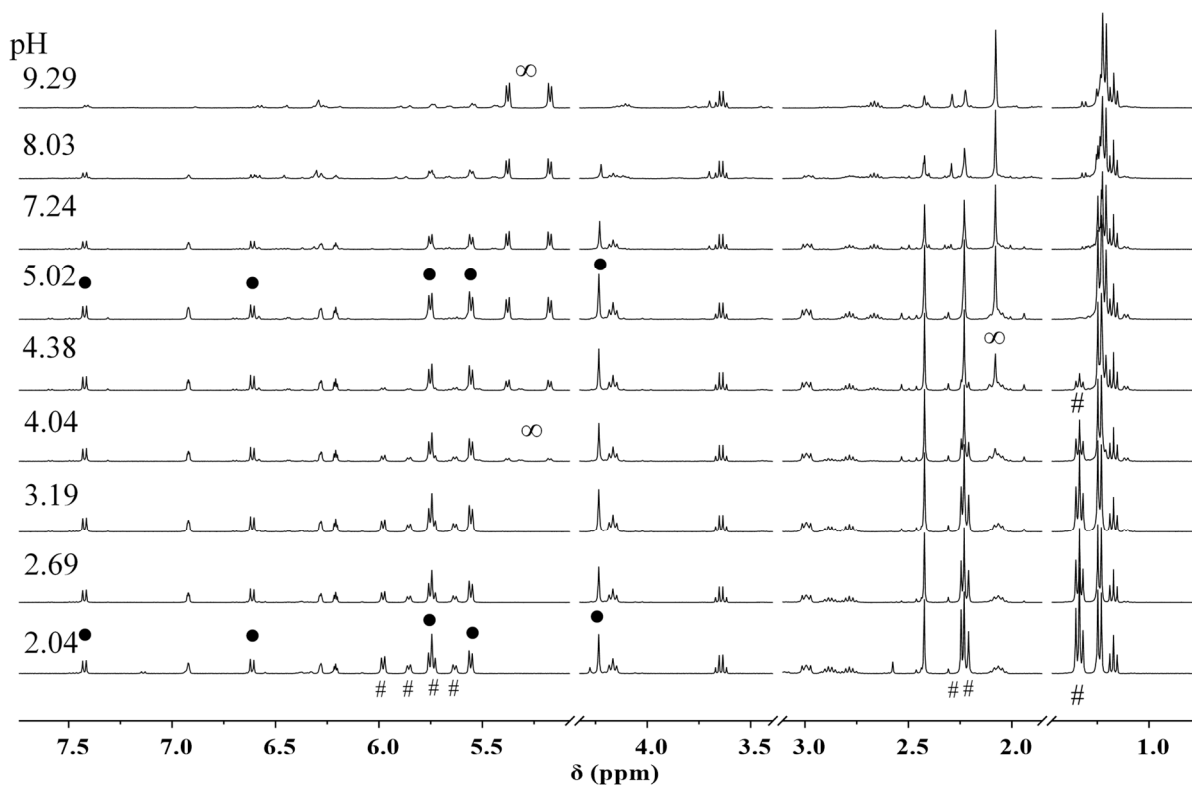

**Figure S11.** pH-dependence of the signals belonging to the protons in the  $[(\eta^6\text{-}p\text{-cym})\text{Ru}]^{2+}$ –L3 system at 2:1 ratio,  $c_{\text{L3}} = 5.0$  mM. Symbols represent the signals of the following species:  $\text{H}_x(\text{L3})$  (\*),  $[\text{M}(\text{H}_2\text{O})_3]^{2+}$  and  $[\text{M}(\text{Cl})_3]^-$  (#),  $[\text{MHL}]^{2+}$  (•),  $[\text{M}_2(\text{OH})_3]^+$  ( $\infty$ ).

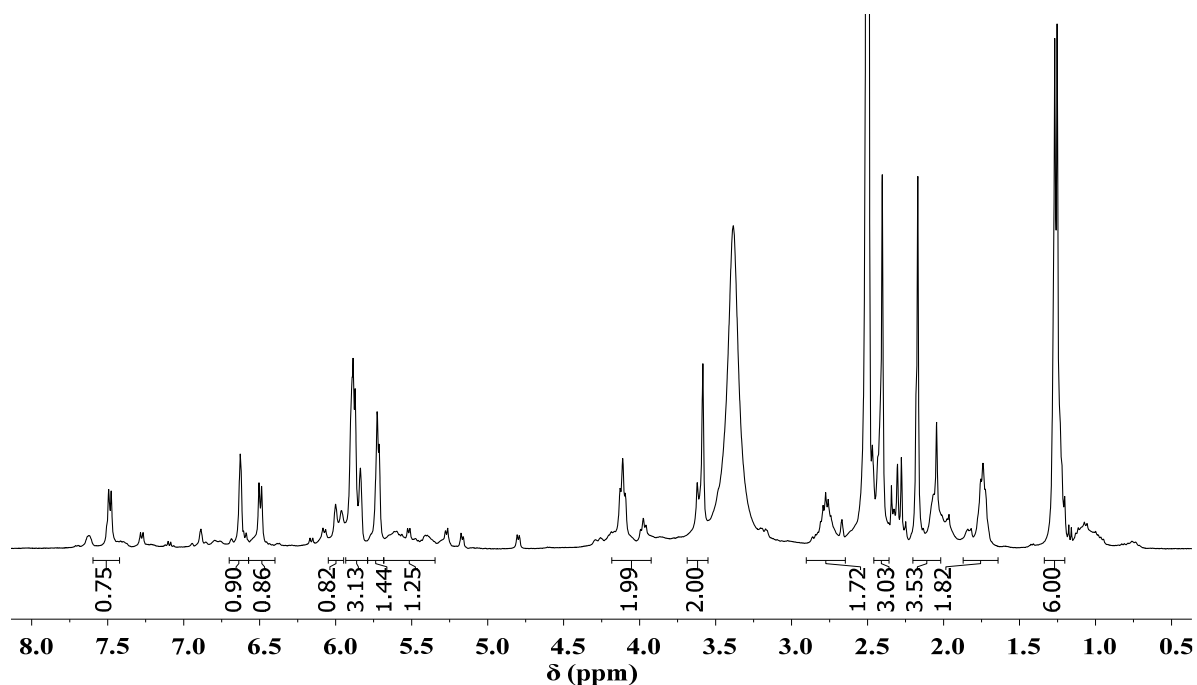

**Figure S12.**  $^1\text{H}$  NMR spectrum of the precipitated yellow solid from a  $[(\eta^6\text{-}p\text{-cym})\text{Ru}]^{2+}$ –L3 1:1 sample, pH  $\sim 8$ , registered in  $\text{d}^6$ -DMSO.

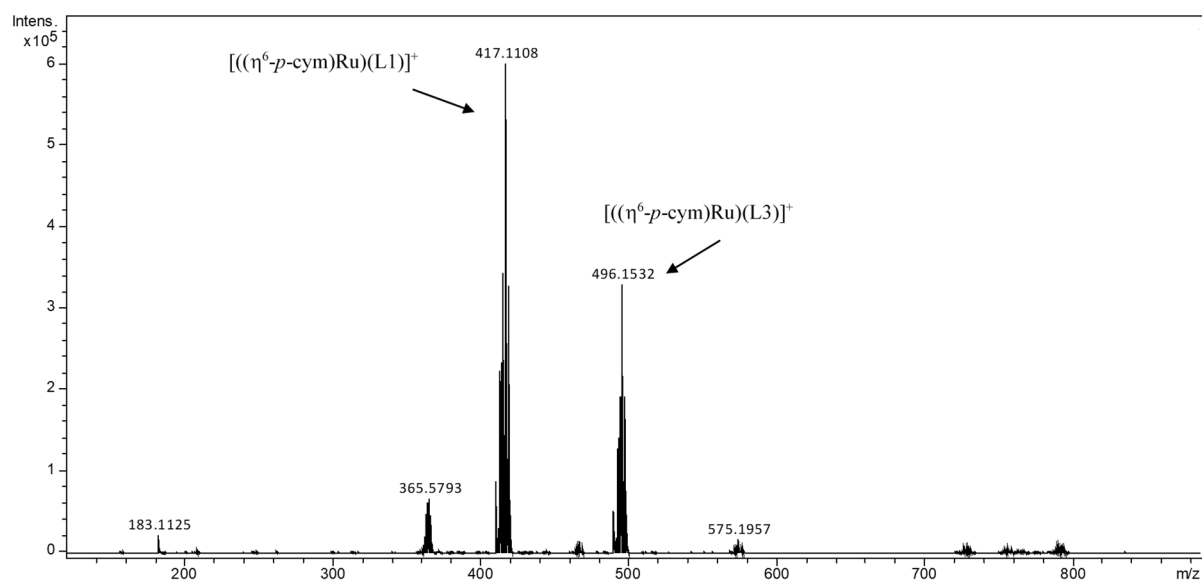

**Figure S13.** ESI-MS spectrum of the precipitated yellow solid from a  $[(\eta^6\text{-}p\text{-cym})\text{Ru}]^{2+}$ -L3 1:1 sample.

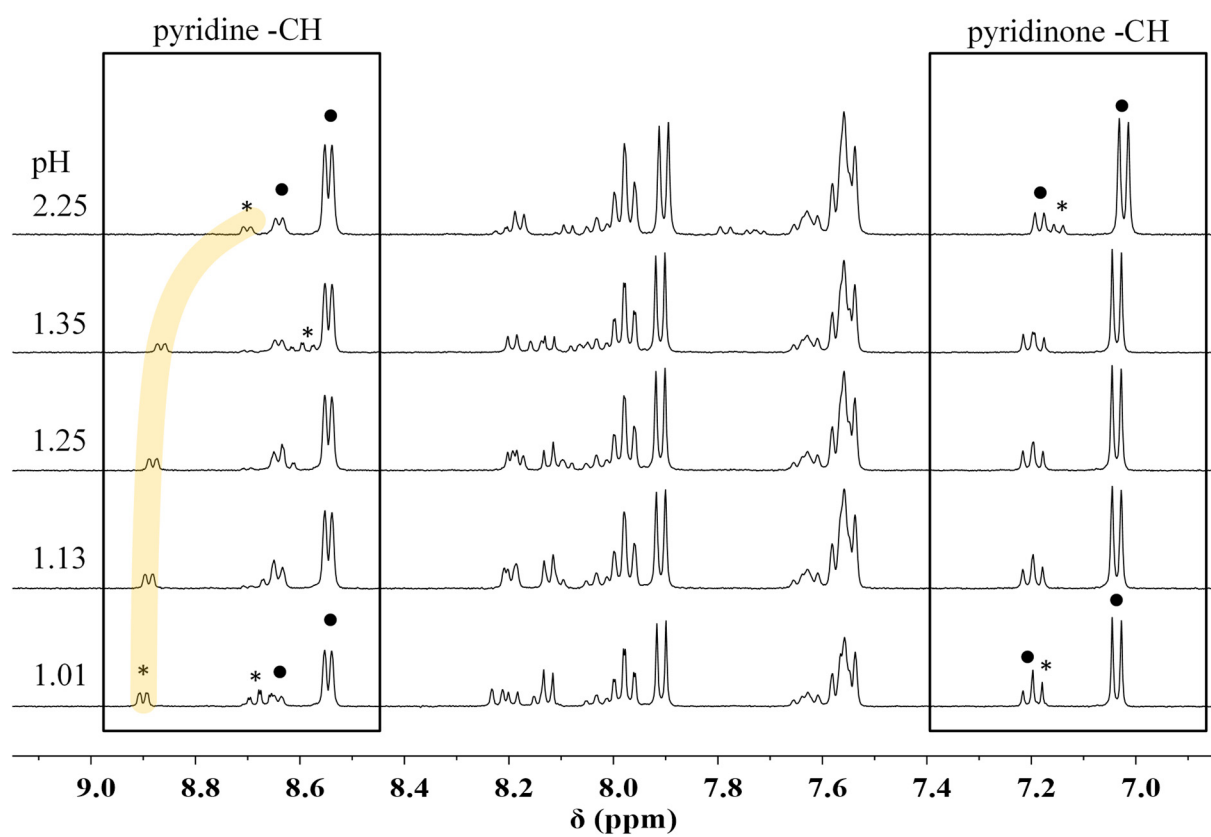

**Figure S14.** pH-dependence of the signals belonging to the L5 protons of a 1:1  $[(\eta^5\text{-Cp}^*)\text{Rh}]^{2+}$ –L5 sample,  $c_{\text{L5}} = 5.0$  mM. Symbols represent the signals of the following species:  $\text{H}_x(\text{L5})$  (\*),  $[\text{MH}_2\text{L}]^{3+}$  (•).

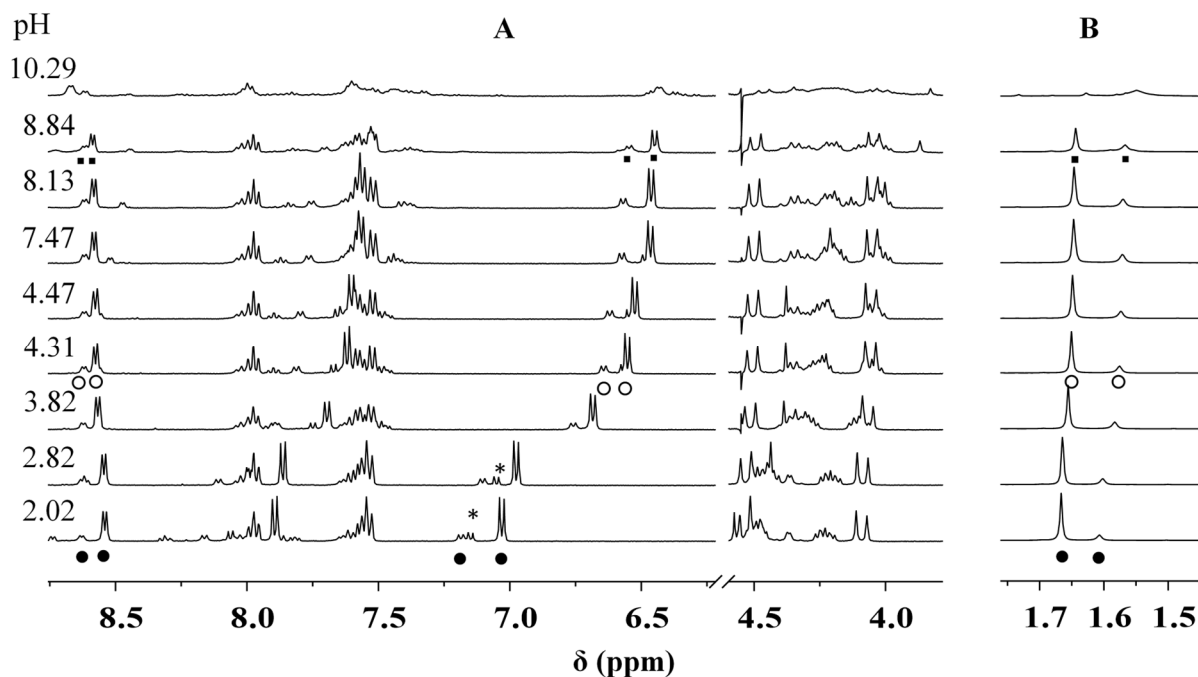

**Figure S15.** pH-dependence of the signals belonging to the L5 protons (A) and Cp\* CH<sub>3</sub> protons (B) of a 0.93:1  $[(\eta^5\text{-Cp}^*)\text{Rh}]^{2+}$ -L5 sample,  $c_{L5} = 5.0$  mM. Symbols represent the signals of the following species:  $H_x(L5)$  (\*),  $[MH_2L]^{3+}$  (•),  $[MHL]^{2+}$  (○),  $[ML]^+$  (▪). The intensity scales are different for Figs. A and B for clarity.

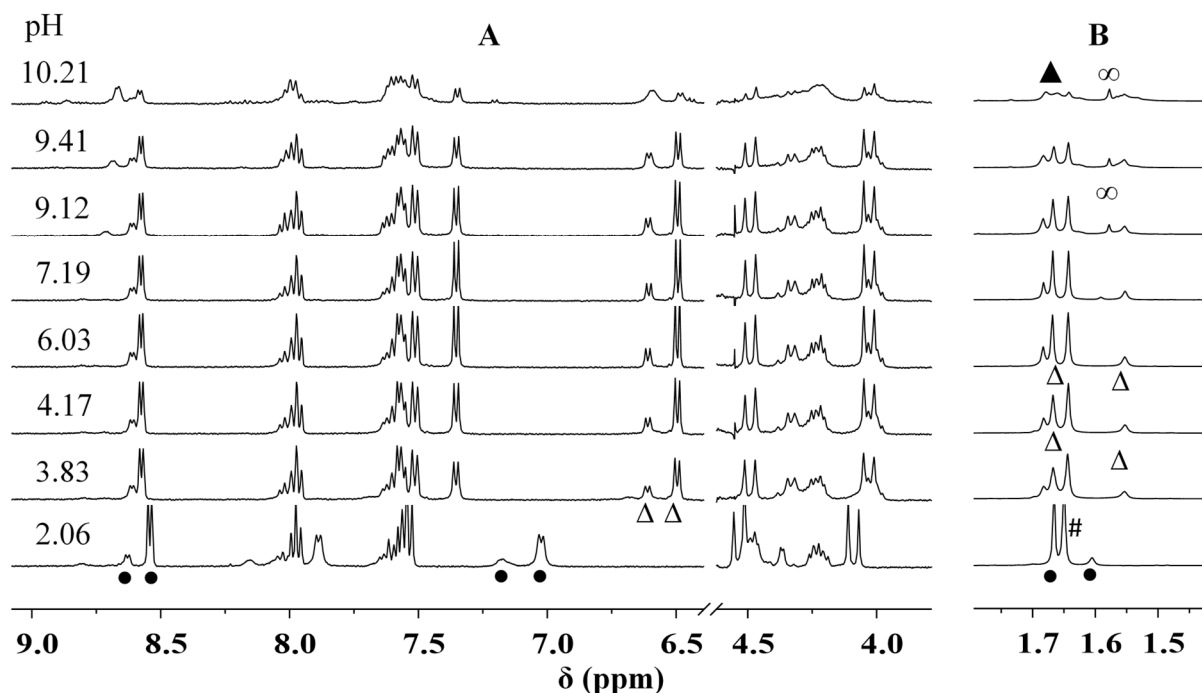

**Figure S16.** pH-dependence of the signals belonging to the L5 protons (A) and Cp\* CH<sub>3</sub> protons (B) of a 2:1  $[(\eta^5\text{-Cp}^*)\text{Rh}]^{2+}$ -L5 sample,  $c_{L5} = 5.0$  mM. Symbols represent the signals of the following species:  $[M(H_2O)_3]^{2+}$  and  $[M(Cl)_3]^-$  (#),  $[MH_2L]^{3+}$  (•),  $[M_2L]^{3+}$  ( $\Delta$ ),  $[M_2H-1L]^{2+}$  ( $\blacktriangle$ ),  $[M_2(OH)_3]^+$  ( $\infty$ ).

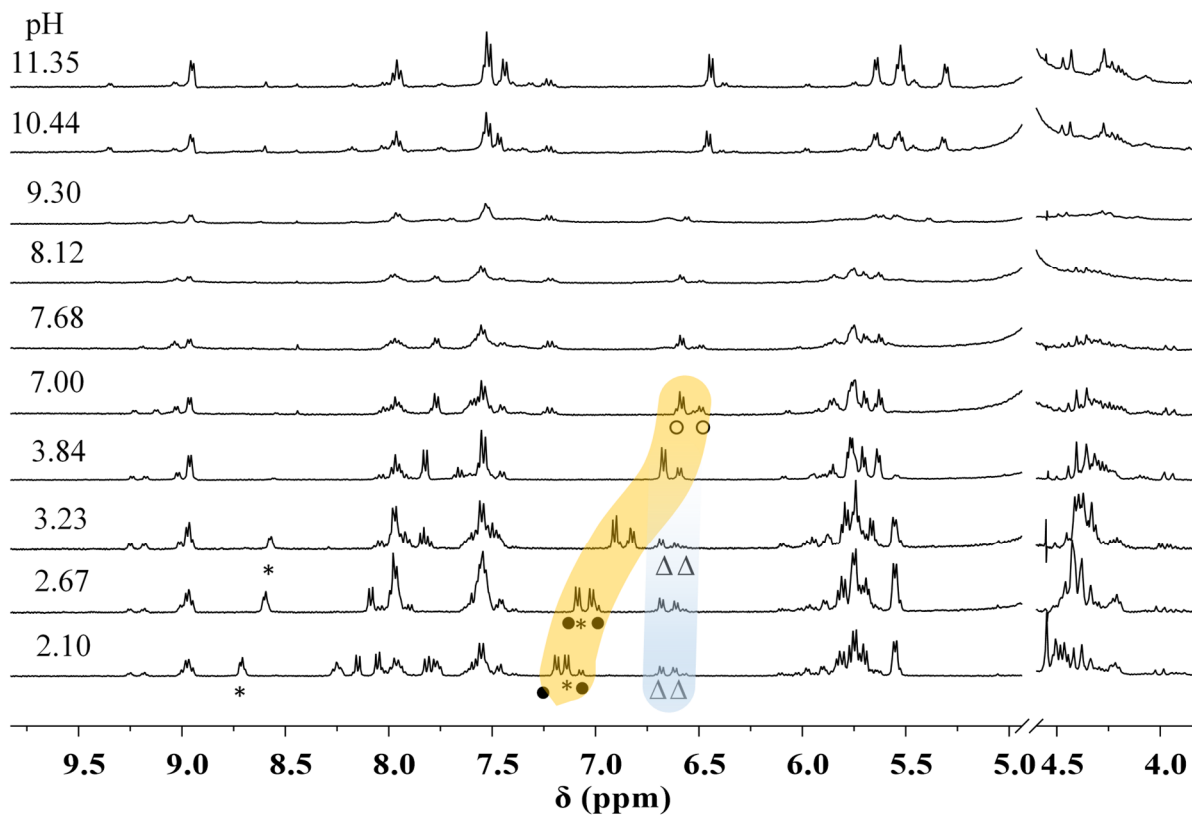

**Figure S17.** pH-dependence of the signals belonging to protons in the  $[(\eta^6\text{-}p\text{-cym})\text{Ru}]^{2+}\text{-L5}$  system at 1:1 ratio,  $c_{\text{L5}} = 5.0$  mM. Symbols represent the signals of the following species:  $\text{H}_x(\text{L5})$  (\*),  $[\text{M}(\text{H}_2\text{O})_3]^{2+}$  and  $[\text{M}(\text{Cl})_3]^-$  (#),  $[\text{MH}_2\text{L}]^{3+}$  (•),  $[\text{MHL}]^{2+}$  (○),  $[\text{M}_2\text{L}]^{3+}$  (Δ),  $[\text{M}_2(\text{OH})_3]^+$  (∞).

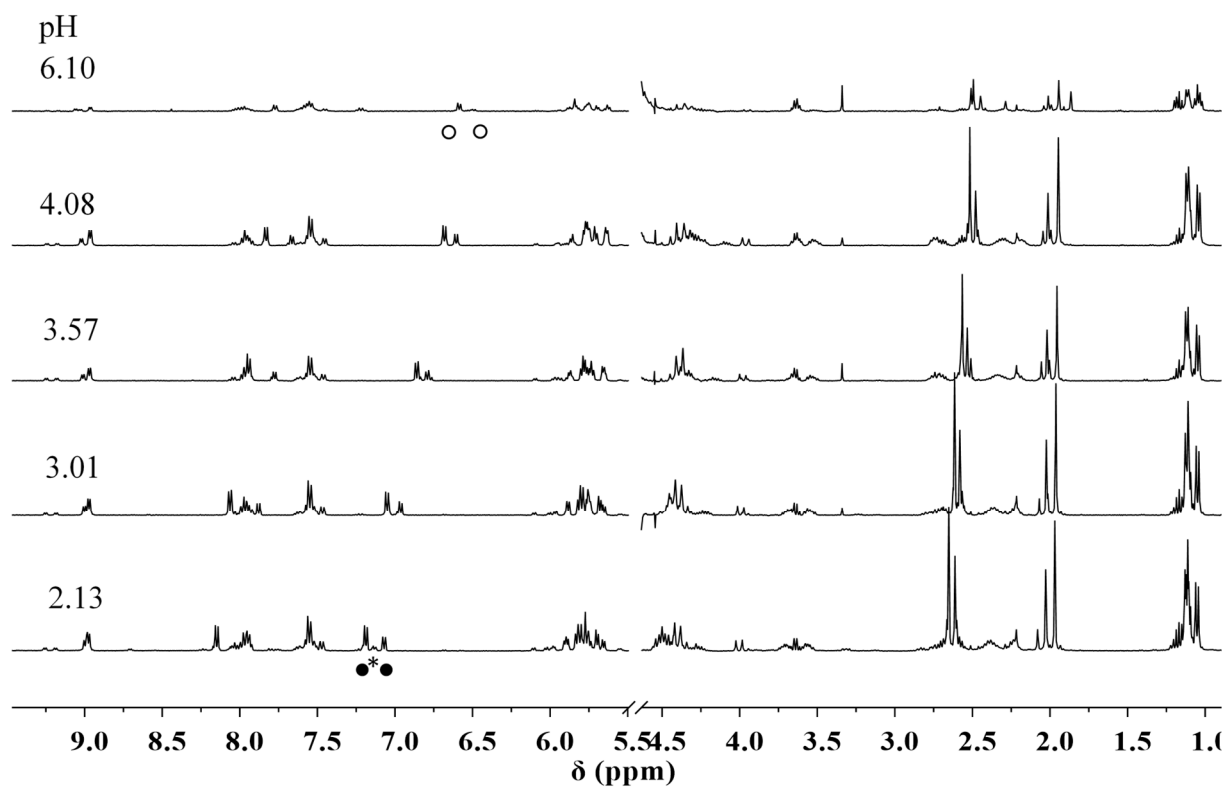

**Figure S18.** pH-dependence of the signals belonging to the protons in the  $[\eta^6\text{-}p\text{-cym})\text{Ru}]^{2+}\text{-L5}$  system at 1:1 ratio,  $c_{\text{L5}} = 5.0$  mM,  $t = 48$  h. Symbols represent the signals of the following species:  $\text{H}_x(\text{L5})$  (\*),  $[\text{M}(\text{H}_2\text{O})_3]^{2+}$  and  $[\text{M}(\text{Cl})_3]^-$  (#),  $[\text{MH}_2\text{L}]^{3+}$  (•),  $[\text{MHL}]^{2+}$  (○).

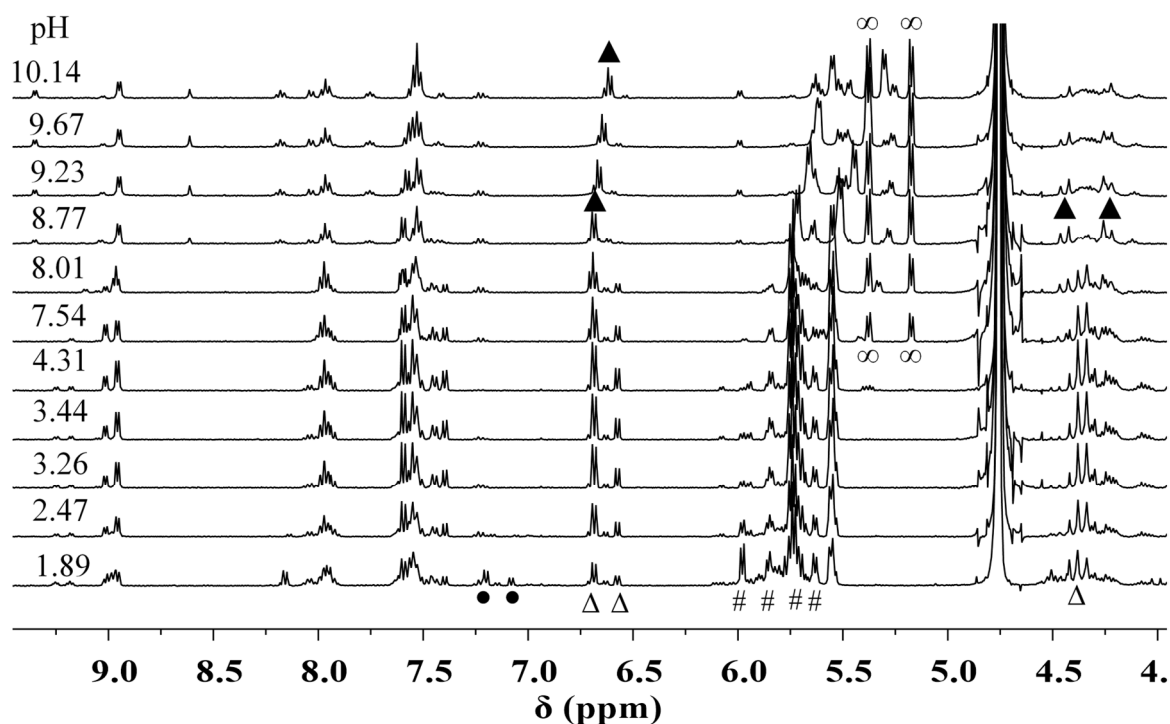

**Figure S19.** pH-dependence of the signals belonging to the protons in the  $[(\eta^6\text{-}p\text{-cym})\text{Ru}]^{2+}$ –L5 system at 2.2:1 ratio,  $c_{\text{L5}} = 5.0$  mM. Symbols represent the signals of the following species:  $\text{H}_x(\text{L5})$  (\*),  $[\text{M}(\text{H}_2\text{O})_3]^{2+}$  and  $[\text{M}(\text{Cl})_3]^-$  (#),  $[\text{MH}_2\text{L}]^{3+}$  (•),  $[\text{M}_2\text{L}]^{3+}$  ( $\Delta$ ),  $[\text{M}_2\text{H-1L}]^{2+}$  ( $\blacktriangle$ ),  $[\text{M}_2(\text{OH})_3]^+$  ( $\infty$ ).

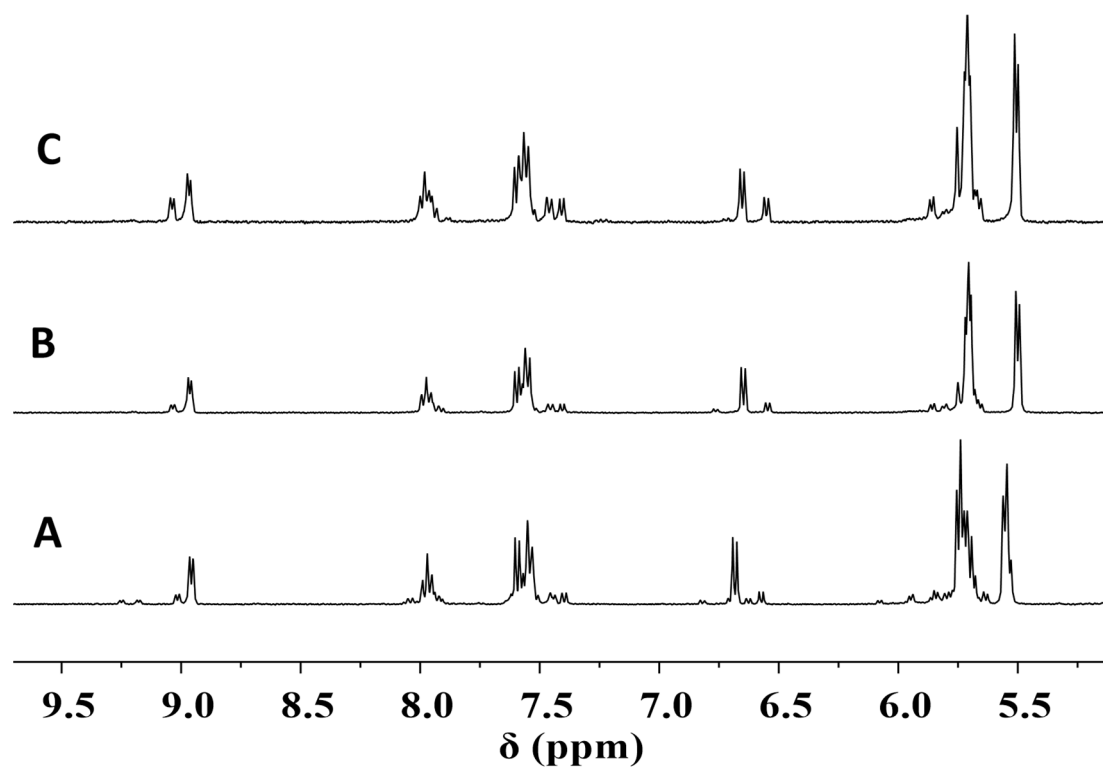

**Figure S20.** Dependence on time and chloride ion concentration of the low field NMR spectra registered in the  $[(\eta^6\text{-}p\text{-cym})\text{Ru}]^{2+}\text{-L5}$  system at 2:1 metal ion to ligand ratio ( $c_{\text{L5}} = 5 \text{ mM}$ ). A:  $I = 0.20 \text{ M (KNO}_3)$ ;  $\text{pH} = 3.74$ ;  $t = 0 \text{ h}$ . B:  $I = 0.20 \text{ M (KNO}_3) + 0.20 \text{ M (KCl)}$ ;  $\text{pH} = 3.74$ ;  $t = 0 \text{ h}$ . C:  $I = 0.20 \text{ M (KNO}_3) + 0.20 \text{ M (KCl)}$ ;  $\text{pH} = 3.74$ ;  $t = 24 \text{ h}$ .
